# Supplementary material
Source: PubMed Central journal article supplement (PMC6645789)
Supplement: ao7b01197_si_001.pdf [file ao7b01197_si_001.pdf]

## Supporting Information

### Self-assembly of graphene-encapsulated Cu composites for nonenzymatic glucose sensing

Qi Zhang<sup>a, b</sup>, Qin Luo<sup>a, b</sup>, Zhenbo Qin<sup>a, b</sup>, Lei Liu<sup>\*, a, b</sup>, Zhong Wu<sup>\*, c</sup>

Bin Shen<sup>a, b</sup>, Wenbin Hu<sup>c</sup>

<sup>a</sup> State Key Laboratory of Metal Matrix Composites, School of Materials Science and Engineering, Shanghai Jiao Tong University, Shanghai 200240, China

<sup>b</sup> Collaborative Innovation Center for Advanced Ship and deep-Sea Exploration, Shanghai, 200240, China

<sup>c</sup> Tianjin Key Laboratory of Composite and Functional Materials, School of Materials Science and Engineering, Tianjin University, Tianjin 300072, China

## CONTENTS

|                                                                        |    |
|------------------------------------------------------------------------|----|
| 1. The characterization of GO sheets.....                              | S2 |
| 2. The size distribution of GO sheets.....                             | S3 |
| 3. The mechanism for the oxidation of glucose on Cu@RGO electrode..... | S4 |
| 4. CV curves of Cu@RGO electrode in NaOH electrolyte .....             | S5 |

.....

---

\* Corresponding author. Tel.: +86 02134203812; Fax: +86 021 34202749  
E-mail: anodic@sjtu.edu.cn

## 1. The characterization of GO sheets

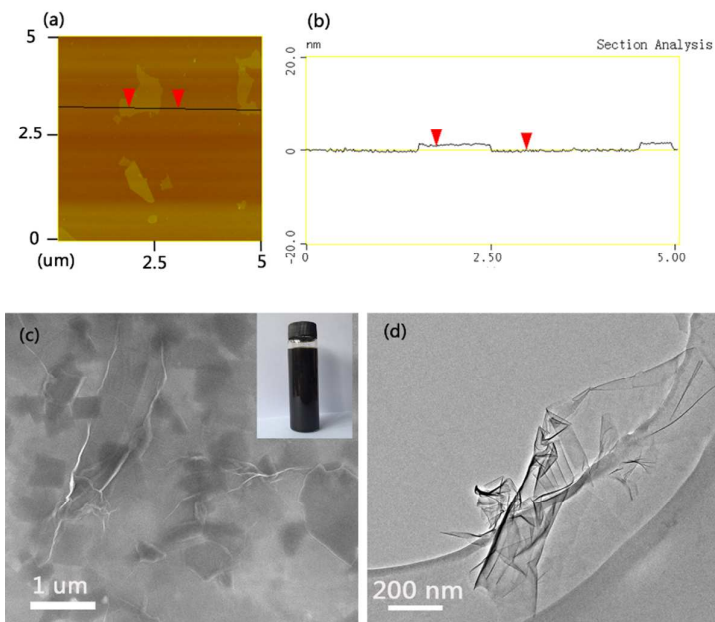

Figure S1. AFM image (a) and height profile (b) of GO sheets; (c) SEM image of GO sheets, the inset showed the digital photo of GO solution; (d) TEM image of GO sheets.

## 2. The size distribution of GO sheets

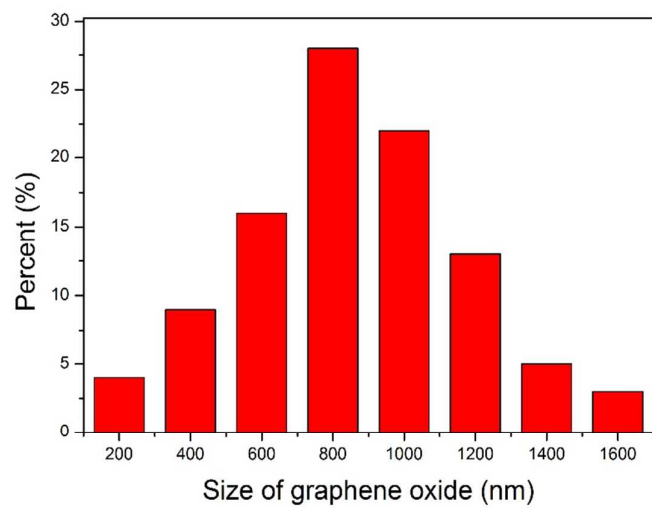

Figure S2. The size distribution of GO sheets which was obtained by ultrasonication for an hour.

### 3. The mechanism for the oxidation of glucose on Cu@RGO electrode

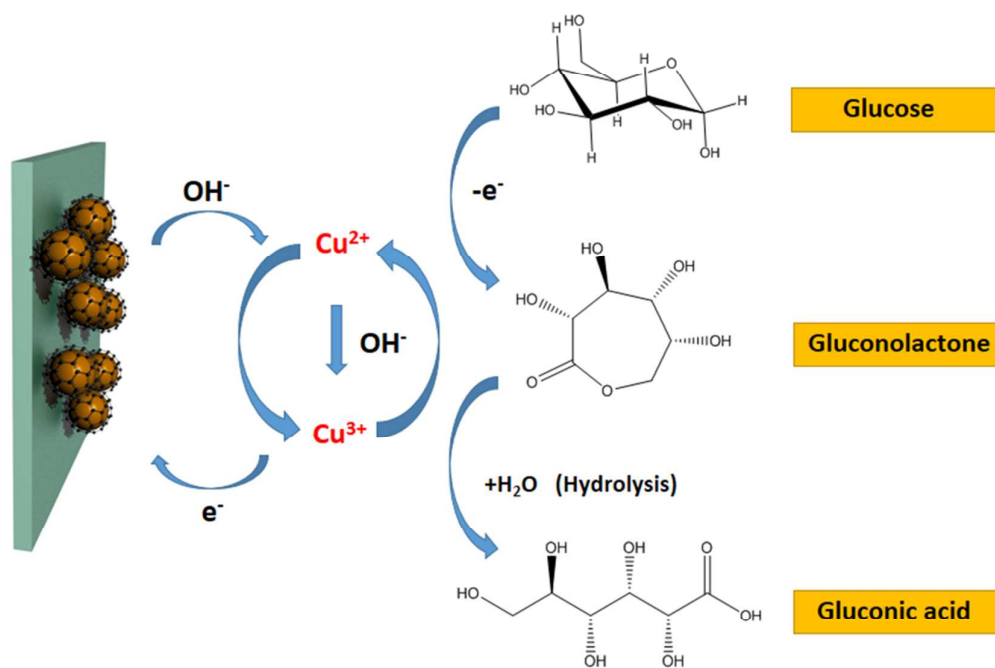

Figure S3. The mechanism for the oxidation of glucose on Cu@RGO electrode.

#### 4. CV curves of Cu@RGO electrode in NaOH electrolyte

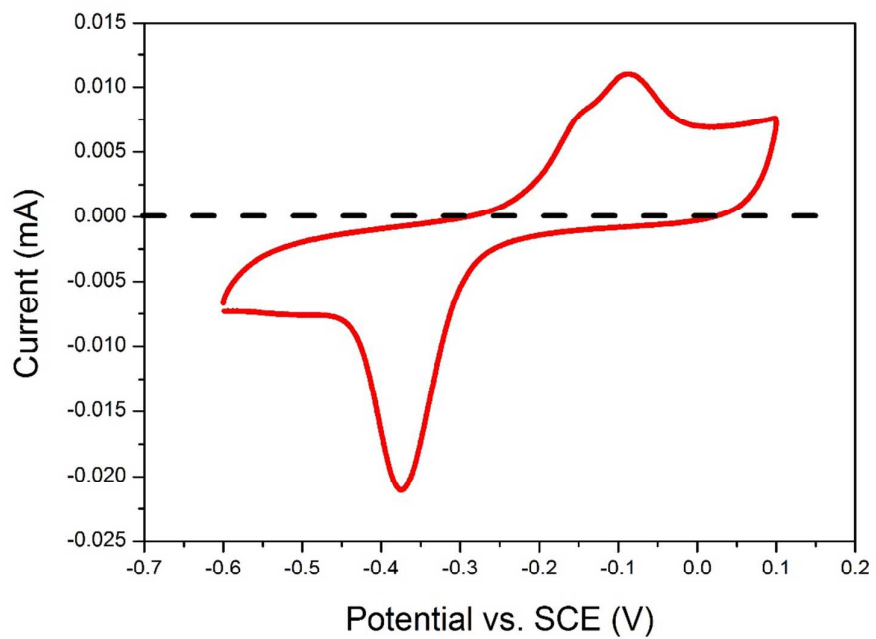

Figure S4. CV curves recorded at graphene-encapsulated Cu nanoparticle in  $N_2$ -saturated 50 mM NaOH electrolyte at 50 mV/s.
